# Supplementary material for: Host-parasite tissue adhesion by a secreted type of β-1,4-glucanase in the parasitic plant Phtheirospermum japonicum
Source: PubMed Central journal article supplement (PMC7393376; doi:10.1038/s42003-020-01143-5), 2020-07-30
Supplement: 42003_2020_1143_MOESM1_ESM.pdf [file 42003_2020_1143_MOESM1_ESM.pdf]

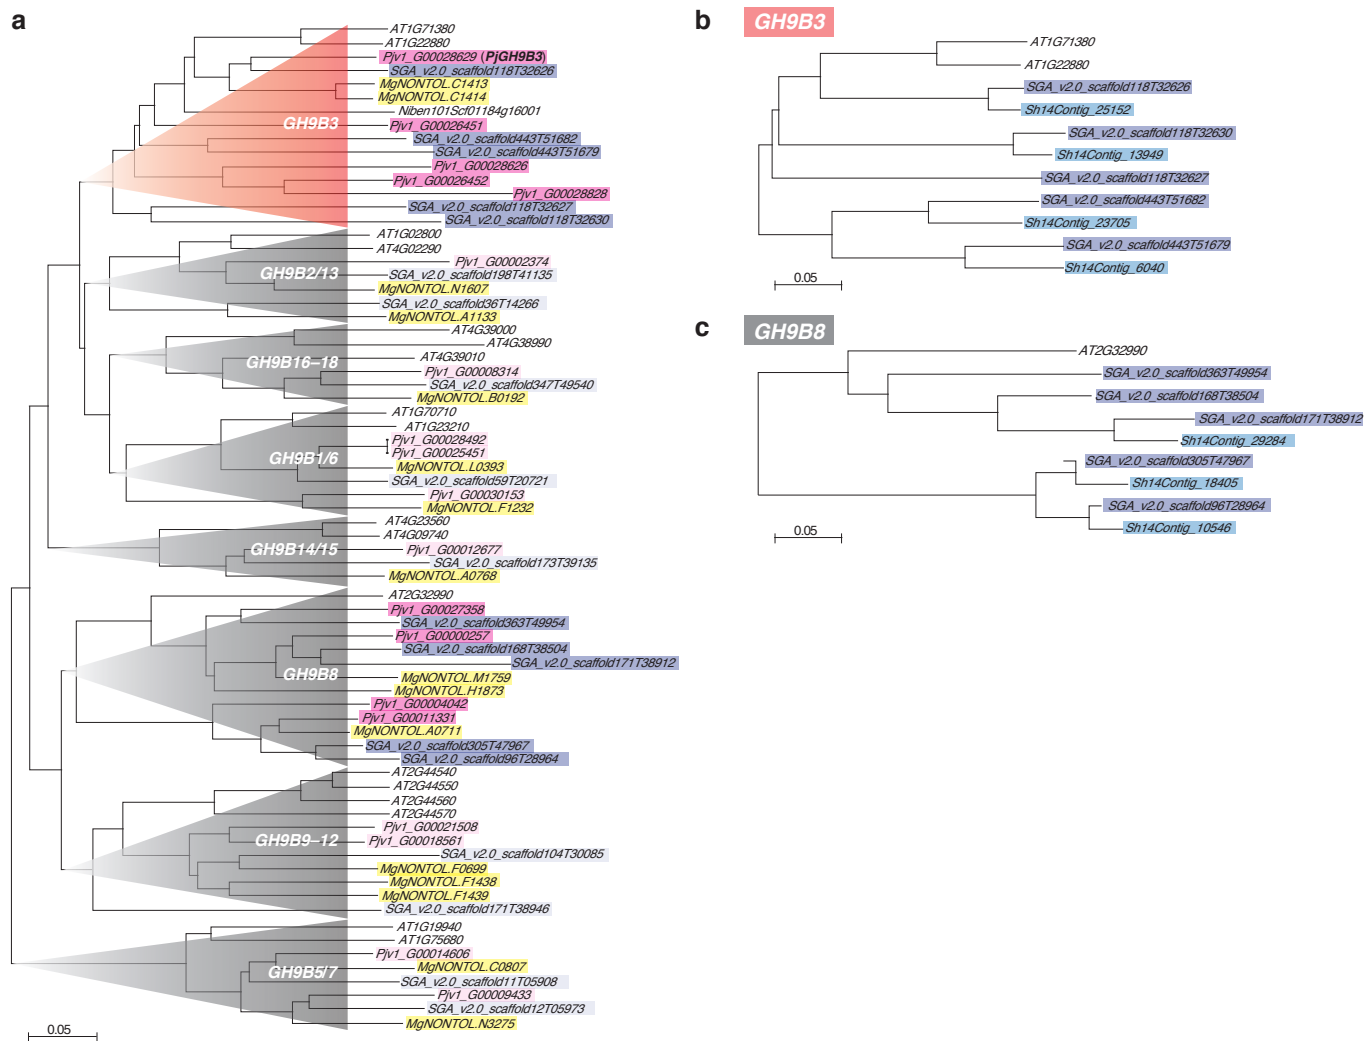

**Supplementary Fig. 2:** Phylogenetic trees of the *GH9B* gene family for *Arabidopsis*, *P. japonicum*, *S. asiatica*, *E. guttata*, and *S. hermonthica*. **a** Phylogeny of *Glycosyl hydrolase 9B* genes of *E. guttata* (yellow), *P. japonicum* (red), *S. asiatica* (indigo), and *Arabidopsis* reconstructed using deduced amino acid sequences. Genes with less than three genes contained in each clade were given light backgrounds. **b, c** Phylogeny of *GH9B3* (b) and *GH9B8* (c) clades of *S. hermonthica* (blue), *S. asiatica* (indigo), and *Arabidopsis*.

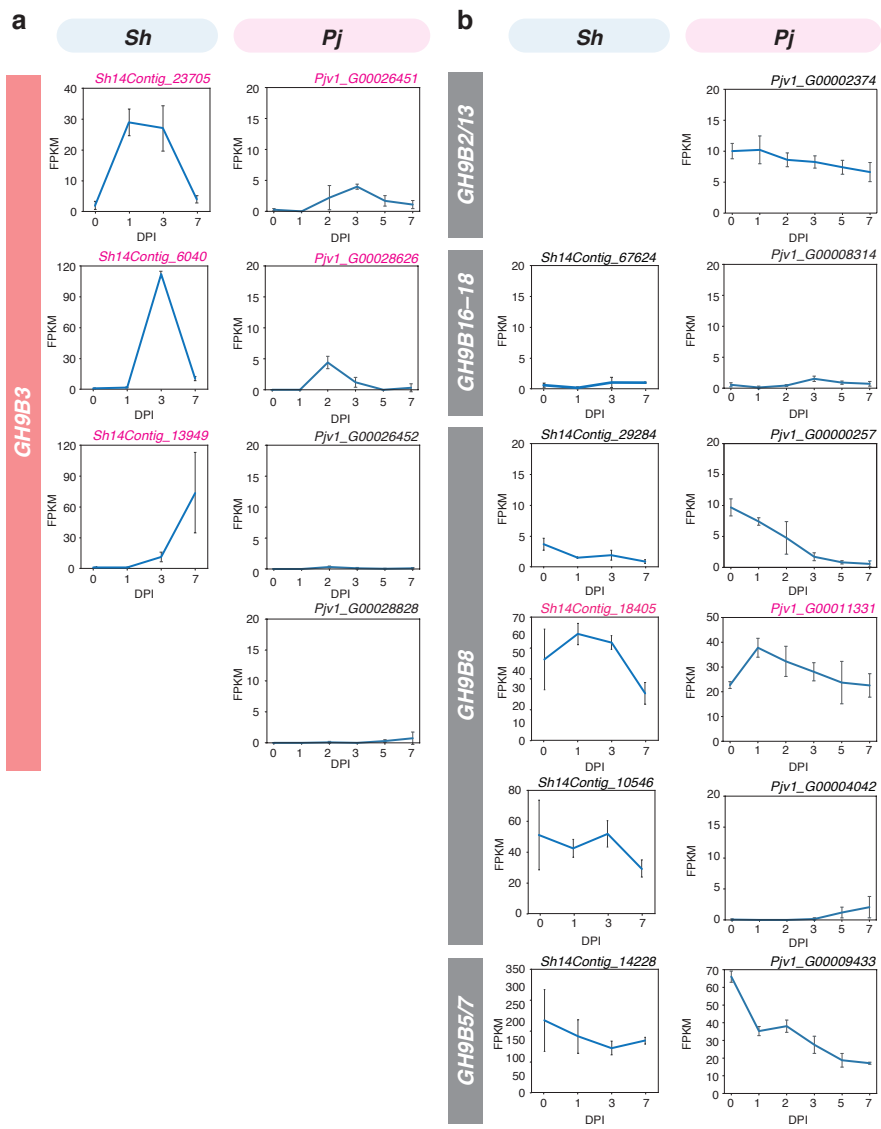

**Supplementary Fig. 3:** Expression levels of other genes for *Glycosyl hydrolase 9B* family in Orobanchaceae. **a** Expression patterns of other genes of *S. hermonthica* belonging to the GH9B3 clade. **b** Expression patterns of other GH9B genes belonging to clades other than GH9B3 in *S. hermonthica* and *P. japonicum*. *Sh*, *S. hermonthica*; *Pj*, *P. japonicum*.

```

Pjv1_G00026452 1 -----MAFL-NGSQYFLSLIILFCLLTFKNSGGDAHDYKDALAKSILFFEGQORSGLPSPMQRMDWRGDSALSDG--AKAGV
Pjv1_G00028828 1 -----MAFLKNGSQYFLFIIILFCLP-FIIRGGDEYNKYKEALTKSILFFEGQORSGLPSPNQRNLNWRADSALYDG--NEAGV
Pjv1_G00028626 1 -----MAFLKNGSQYFLFIIILFCLP-FIIRGGDEYNKYKEALTKSILFFEGQORSGLPSPNQRNLNWRADSALYDG--NEAGV
AT1G22880 1 -----MASPFFFFVPLLSALS-LENTY-ASPNYRREALSKSLFFQORSGLPSPDQLSWRSSSGLSDG--SSAHV
AT1G71380 1 -----MTSLFFFLVLLFSSLL-ISNGD-ANPNKYKEALSKSLFFQORSGLPSPRGOQISWRASSGLSDG--SAAHV
Pjv1_G00028629 1 MAFLKLSPHFLHLTFLLLSLITFLSNFTNVH-ASQNYRDALAKSILFFQORSGLPSP-ODITWRANSGLSDG--HPAGV
Pjv1_G00026451 1 MAFLNG-----STSEFLILFSFTFLCNLRNVQSDRHNKYKEALTKSILFFQORSGLPSPSTQOITWRGDSALSDGKAGAGV

Pjv1_G00026452 73 DLTGGYYDAGDNVKNFNPMAFTTTMLSWSVIEFGGKLVKKTGOLKSAREAVKMGTDYLLKCASSKVRSSDNKLFVGVANPSTLD
Pjv1_G00028828 5 DLTGGYYNVGDNVKNFNPMAFTMTVLSWSVIEVVGQMAKTGQPKSAQEAIRWGTGYLLKCASQVKSSRKLFVGVGDPSNRD
Pjv1_G00028626 73 DLTGGYYDAGDNVKNFNPMAFTMTVLSWSVIEFGSLMERGDLDSAREAIKMGTDYLLKCASQVESHSNKLYSGVGDSPNKD
AT1G22880 67 DLTGGYYDAGDNVKNFNPMAFTTTMLSWSSLEYGKMGMP--ELONSSRVAIRWADYLLKCARATSPG--KLYVGVGDSPNGD
AT1G71380 67 DLTGGYYDAGDNVKNFNPMAFTTTMLSWSALEYGKRMGP--ELENARVNISRWADYLLKCARATSPG--KLYVGVGDSPNVD
Pjv1_G00028629 77 DLTGGYYDAGDNVKNFNPMAFTTTMLSWGAIEYGRRLGP--OLOSTRSRAIRWGTGYLLKCARATSPG--KLYVGVGDSPNRD
Pjv1_G00026451 76 NLTGGYYDAGDNVKNFNPMAFTTTMLSWGVIEYGRRLGA--ELOHAREAIRWGTGYLLKCALESTPG--KLYVGVANPSNLD

Pjv1_G00026452 153 HNCWERPEDMDTDRSVSVSVA---GSDVAGETAALAAASIVFRKANSSSYKLLRNTANDVMQFAINSNKSGAYSDSOLGGNV
Pjv1_G00028828 85 HOCWERPEDMDTDRSVSVSVA---GSDMAGETAALAAASIDFKRAELTSYKLLRKTADVSVMFAINSNKWAYSSDOSLRNNV
Pjv1_G00028626 152 HNCWERPEDMDTDRSVSVSVA---GSDLAGETAALAAASIVFRKANHRYSEQLRNTAEVSVMQFAINSQVSY---GSV
AT1G22880 143 HKCWERPEDMDTDRSVSVSSNPGSDVAAETAALAAASSSMVFRKVDSPKYSRLLSLATAKSVMQFAISQYRGAYSSNSSSSSV
AT1G71380 143 HKCWERPEDMDTDRSVSVSSNPGSDVAAETAALAAASSSMVFRKVDSSKYSRLLSLATAKSVMQFAISQYRGAYSSNSSSSSV
Pjv1_G00028629 153 HNCWERPEDMDTDRSVSVSSNPGSDVAAETAALAAASIVFRKVDSPNYSKLLSNTAKSVMQFAISSYRGAYSSNSSGPYV
Pjv1_G00026451 152 HOCWERPEDMDTDRSVSVSSNPGSDVAAETAALAAASIVFRKVDSPNYSKLLSRNTAKSVMQFAISDHRGAYSSNSSLAPYV

Pjv1_G00026452 230 CPFYCSYSGFKDELLWGAAWLYKATGSPVYRNYITSSYGENDDSVDIFSWDNKFAGANSVLLAKEYLVGNSNRTSFOKSNEKAET
Pjv1_G00028828 162 CPFYCSCLEFKDELLWGEVGLYKATRLSEFYRNYITSSYGDNDDADILSDSSKFAGANSVLLAREYLVGKSDRTFEKSFGRAET
Pjv1_G00028626 224 DGFYQSYSGFEDELLWGAAWLYKATNSKTSYRNYITSSYGDDDDVDSTFGWDSKSFGAYVSVLLAREYLVGKSDENSFEKSKEKAET
AT1G22880 223 CPFYCSYSGKDELLWGAAWLHSRATNSPFYANSFKSLGGGDSQPDIFSWDNKYAGAYVSLLSRRAVLSNKDNSNFELYSQAAEN
AT1G71380 223 CPFYCSYSGKDELSMWGASWLLRATNSPFYANSFKSLGGGDSQPDIFSWDNKYAGAYVSLLSRRAVLSNKDNSNFELYSQAAEN
Pjv1_G00028629 233 CPFYCSYSGYKDELLWGAAWLFRATNSLVYSYLFSIGSLGANDSGTDIFSWDNKYAGARVSLLSRRLSLVNDSPTSQSFSRQAAED
Pjv1_G00026451 232 CPFYCSYSGYKDELSFWGASAWLFRATNSSVYSYDFSIRTLGANDSDANIFSWDNKFAGARVSLLSR-----QSFSQAAEN

Pjv1_G00026452 310 FMCKILRG--SPSLSSIQYTOGGLIH--RLHDSSTLOYTTSSMTFLITSVYAKYLANSRNAPKSHSSFNCNGRSGFNSTSNLRVQASKAQ
Pjv1_G00028828 242 FMCKILRN--SPSLSSIQYTPGDSLIH--RLHDNSTLOYTTSSMTFLITSTYAKYIASSRNAPKSHNSFCSRVRVFN-----
Pjv1_G00028626 304 FMCKILRD--SPSLSSIQYTPGGSMMYKNLSPDSPLOYVTSSLSFLITSTYAKYLANSRHSSPTHKIDSCEGHAFSNPKSKLSRNQASKAQ
AT1G22880 303 FMCKILPN--SPSSSTQYTPGGSLMY--KLSPOSSNLOYVTSSITFLSTTYAKYMK--STKSQTFSNCGNSSLIVPSNALINSLSKSRO
AT1G71380 303 FICKILPD--SPSSSTQYTPGGSLMY--KLSPOSSNLOYVTSSITFLSTTYAKYMK--ATKSHTSFCGSSSVIVPSNALINSLSKSRO
Pjv1_G00028629 313 FMCKILPNSYSRSSSTQYTPGGSLMY--KMDASSNLOYVTSSITFLSTTYSSKYMA--TKSHTSFCGNSLPTSSNILSRSTSLAKSKQ
Pjv1_G00026451 301 FMCKILPNS-PYLSSDTQYTPGGSLMY--KLDGSSNLOYVTASITFLSTTYAKYLANSRNSSPKSHSSFCGSGQISYSTASSYLRSVSAKSQO

Pjv1_G00026452 386 VDYILGSTNRMKMSYMGVYSGPKYSPMRSVHSRGASSLE---LGKKISSCGDSGF--TYLSHTSPNSPNPNSILSTGAISVGGPSDENDSFVSKDN
Pjv1_G00028828 307 -----PTYS-----
Pjv1_G00028626 382 VDYILGSTNPMKSSYMVDSYGPSIFSPERSVHSRAASSSPSVRAPSPHSIASCGVSGFGLYSLHSYSNPSNPSNTSLGAISVGGPSDNDSVYSLDD
AT1G22880 376 VDYILGVNPMKMSYMGVSSSNSFPKSRSISHSRGSSSLPSSRAVSRSSNSSLGSCNGSGF--QSSFSYSQSNPSNPSNTSLGAISVGGPSNDSEVSPDQ
AT1G71380 376 VDYILGDNPIKMSYMGVSSSNSFPKSRSISHSRGSSSLPSSHALSRSSQSLGSCNGSGF--QSSFSYSQSNPSNPSNTSLGAISVGGPSNDSGVSPDQ
Pjv1_G00028629 388 VDYILGDNPMKMSYMGVYSQGSSFPKSRSISHSRGSSSLPSSRNSVSPSSQSFGSCDSGK--QSFFSYSQSNPSNPSNTSLGAISVGGPSNHSNDSFFSADE
Pjv1_G00026451 378 VDYILGDNPMKMSYMGVYSTSKNSFPKSRSISHSRGSSSVPSSISIDSHPSKSITSCGESGF--SYSLQSTSSSANSPNSILSTGAISVGGPSDRSNDSVSADD

Pjv1_G00026452 461 RDEYSQSESPATYINAPLVGSTLAYFAAKSKQ-
Pjv1_G00028828 -----
Pjv1_G00028626 462 RSSYSQSESPATYINAPLVGSILAYFAGKSKQ-
AT1G22880 455 RDDYSTRSESPATYINAASAVGSPLAYFAASSRSP
AT1G71380 455 RDDYSSHSESPATYINAASAVGSPLAYFAAGRSST
Pjv1_G00028629 467 RTDYSSHSESPATYINAASIVGSPLAYFAAVN--
Pjv1_G00026451 457 RNNFGSQSESPFTTYINAASIVGSPLAYLAASKQ--

```

**Supplementary Fig. 4:** Alignment analysis of amino acid sequences for genes of the GH9B3 clade in *Arabidopsis* and *P. japonicum*. Amino acid sequence alignments were performed on genes of *Arabidopsis* and *P. japonicum* GH9B3 clade using clustal2.1 software. The amino acid residues highlighted in tangerine and magenta indicate a catalytic domain and O-glycosylation sites, respectively. Red line indicates the secretory signal peptides.

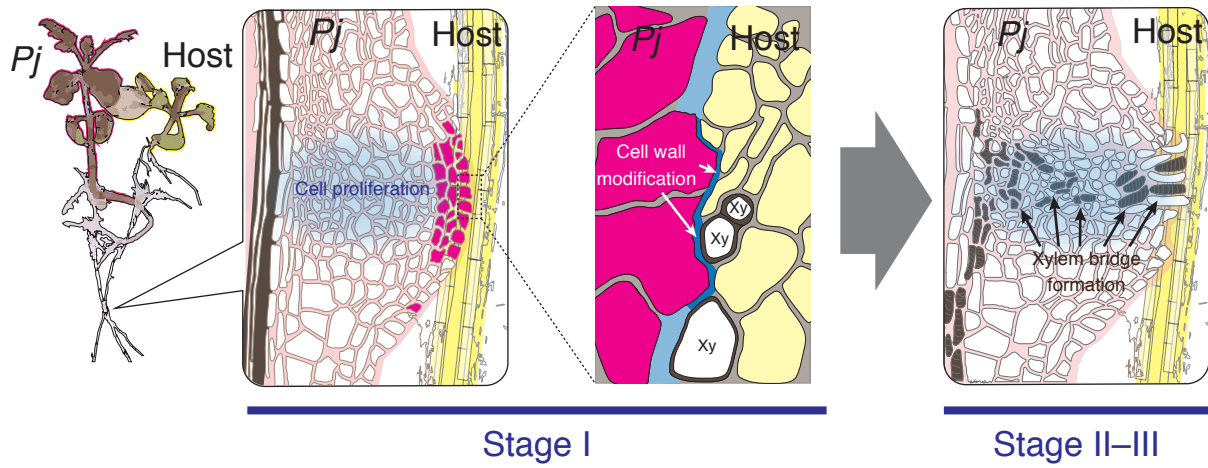

**Supplementary Fig. 5:** Model of parasitism by *P. japonicum*. Upon detection of host plant roots, *P. japonicum* generates haustoria where cells are proliferated through cell division (colored in blue shade). *PjGH9B3* is induced at the periphery of the haustorium (colored in magenta) to facilitate tissue adhesion when in contact with the host plant root (stage I). In magnified illustration, the interface between cells of *P. japonicum* and host plant is marked in blue and especially thin cell wall region through cell wall modification is marked in dark blue. Subsequently, a xylem bridge (colored in brown) is formed between *P. japonicum* and the host plant root (stages II–III). Arrows indicate decreased cell wall thickness at the interface between parasitic and host tissues. *Pj*, *P. japonicum*. Xy, Xylem.
